# Supplementary material for: A H-titanate nanotube with superior oxidative desulfurization selectivity
Source: Royal Society of Chemistry journal article supplement (doi:10.1039/c6gc03573f), 2017-01-01
Supplement: c6gc03573f2.pdf [file c6gc03573f2.pdf]

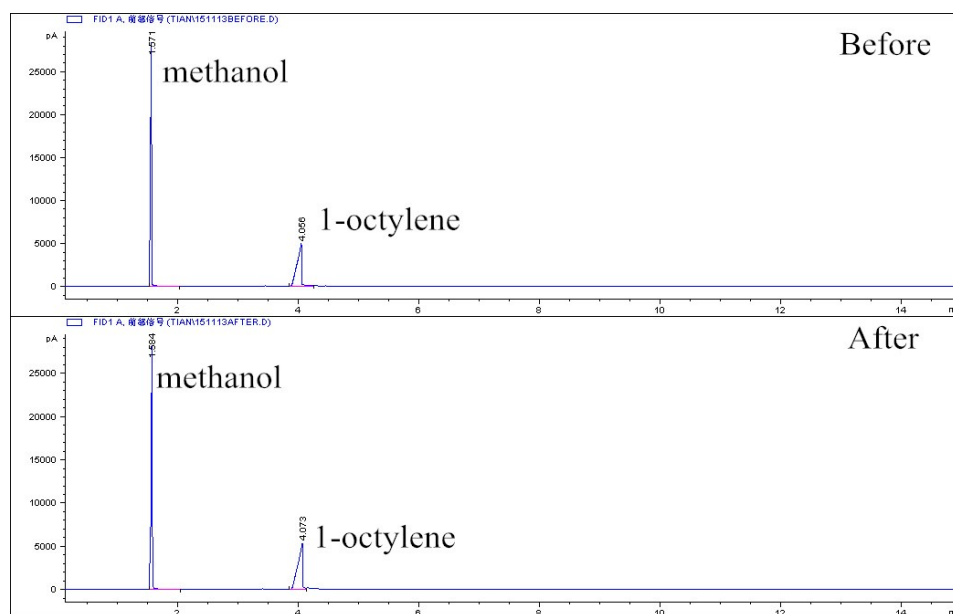

**Figure S1** The results of the oxidation of alkene. Reaction conditions: m (Catalyst) = 0.1 g, T = 313 K, V(H<sub>2</sub>O<sub>2</sub>) = 2.2 mL, t = 60 min
