# Supplementary material for: A H-titanate nanotube with superior oxidative desulfurization selectivity
Source: Royal Society of Chemistry journal article supplement (doi:10.1039/c6gc03573f), 2017-01-01
Supplement: c6gc03573f3.pdf [file c6gc03573f3.pdf]

## Supporting Information

In order to exploration the oxidation of alkene when H-TiNTs were used as the catalyst. 1-octylene was added into methanol with a mass fraction of 20 wt%. Evaluation of oxidative performance of the H-TiNTs was conducted in a 100-mL three-neck flask equipped with magnetic stirrer and condenser. In the reaction, 0.1 g H-TiNTs, 15 mL solution described above, and 2.2 mL  $\text{H}_2\text{O}_2$  were added to the reactor and stirred for 60 min at 313 K. After that, the products of reaction were analyzed by a GC-HP6890 (Agilent Technologies, Santa Clara, CA). And the results are shown in Figure S1.

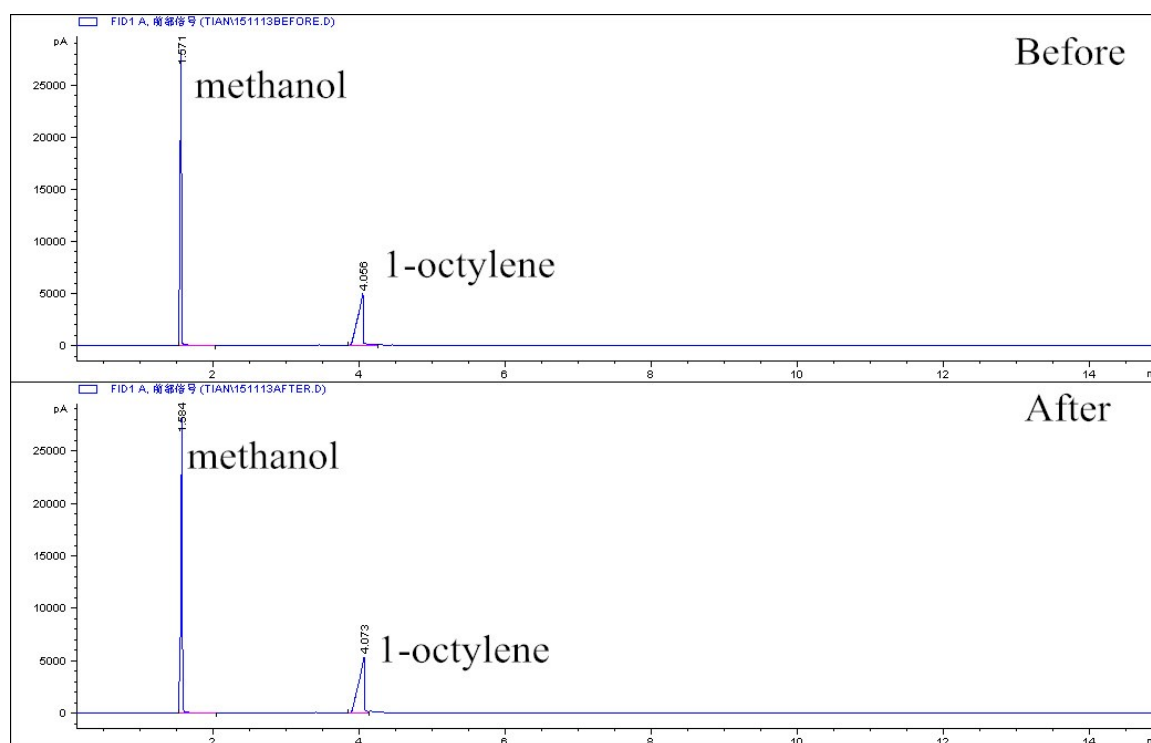

**Figure S1** The results of the oxidation of alkene. Reaction conditions: m (Catalyst) = 0.1g, T = 313K, V( $\text{H}_2\text{O}_2$ ) = 2.2 mL, t = 60min

---

It is clear that no oxidation products were detected after oxidation reaction. One can draw the conclusion that there were no alkenes or even a trace amount of alkenes involved in the oxidation reaction when H-TiNTs were used as the catalyst.
